# Supplementary material
Source: publisher figshare collection journal article supplement (https://gsapubs.figshare.com/ndownloader/files/23307749)
Supplement: Supplementary file 1 [file 23307749]

## Sheet: Model01_AMS
Name	Field	Freq.	Km	L	F	P	Pj	T	U	K1dec	K1inc	K2dec	K2inc	K3dec	K3inc	K11	K22	K33	K12	K23	K13
SB16-01-01	200	F1	27263.2	1.043	1.057	1.103	1.103	0.136	0.112	105.9	1.2	196.4	23.3	13.2	66.6	0.99882	1.04333	0.95785	-0.01337	-0.00368	-0.01953
SB16-01-02	200	F1	35373.6	1.074	1.045	1.122	1.123	-0.242	-0.269	86.6	17.1	179.5	9.5	297.3	70.3	0.98888	1.05256	0.95856	0.00597	0.03252	-0.00491
SB16-01-03	200	F1	29633.7	1.031	1.064	1.097	1.099	0.342	0.322	57.3	19.8	155.8	22.3	289.7	59.4	1.01609	1.0154	0.96851	0.01753	0.0334	-0.0036
SB16-01-04	200	F1	28204.7	1.063	1.039	1.104	1.105	-0.23	-0.253	86.1	6.5	179.2	25.5	342.7	63.6	0.98519	1.05221	0.9626	0.00632	0.01145	-0.01366
SB16-01-05	200	F1	29126.8	1.032	1.049	1.082	1.083	0.205	0.186	47.1	10.5	313.2	20.3	163	66.9	1.01265	1.02086	0.96649	0.01743	-0.0007	0.02
SB16-01-06	200	F1	31403.7	1.022	1.071	1.095	1.099	0.518	0.502	113.6	2.4	23.1	12	214.7	77.7	1.01654	1.03278	0.95068	-0.00963	0.00885	0.01115
SB16-01-07	200	F1	24917.3	1.022	1.104	1.128	1.137	0.643	0.625	106.2	2.2	15.8	11.5	206.9	78.3	1.02323	1.04428	0.93248	-0.00755	0.00951	0.01686
SB16-01-08	200	F1	23533	1.014	1.086	1.101	1.11	0.719	0.707	324.7	16.1	62	23.9	203.9	60.6	1.01469	1.02356	0.96175	-0.01333	0.01196	0.03483
SB16-01-09	200	F1	32206.4	1.031	1.067	1.1	1.102	0.354	0.333	24.5	10.8	294.4	0.3	202.9	79.2	1.03394	1.01546	0.9506	0.01072	0.00699	0.0161
SB16-01-10	200	F1	28698.7	1.034	1.048	1.084	1.084	0.158	0.138	356.5	7.4	265.2	9.7	123	77.8	1.03697	1.00239	0.96064	-0.00116	-0.0082	0.00955
SB16-01-11	200	F1	28231.4	1.039	1.086	1.128	1.131	0.365	0.338	356.9	0.4	266.8	4.5	91.4	85.5	1.05301	1.01314	0.93385	-0.00215	-0.00627	0.00039
SB16-01-12	200	F1	29456.8	1.022	1.069	1.093	1.097	0.515	0.499	165.8	0.8	255.9	7.2	69.1	82.8	1.03519	1.01503	0.94977	-0.00558	-0.00759	-0.00324
SB16-01-13	200	F1	27712.4	1.043	1.075	1.121	1.123	0.267	0.24	195.4	1.1	105.2	9.9	291.5	80.1	1.0491	1.01035	0.94055	0.01181	0.01095	-0.00518
SB16-01-14	200	F1	28379.8	1.059	1.086	1.15	1.151	0.174	0.14	183.6	2.9	93.6	0.8	349.1	87	1.06573	1.00673	0.92754	0.00383	0.0006	-0.00715
SB16-01-15	200	F1	27185.5	1.074	1.093	1.174	1.175	0.108	0.068	175.9	4.2	266	1.4	14.3	85.6	1.07694	1.004	0.91906	-0.00538	-0.00123	-0.01171
SB16-01-16	200	F1	28034.8	1.053	1.06	1.116	1.116	0.058	0.031	355.8	2.6	265.7	1.4	147.7	87.1	1.05366	1.00137	0.94497	-0.00379	-0.00169	0.00476
SB16-01-17	200	F1	28361.7	1.023	1.091	1.116	1.123	0.585	0.567	5.9	18.4	98.2	6.8	207.7	70.3	1.03384	1.01859	0.94758	-0.0018	0.01322	0.03077
SB16-01-18	200	F1	27330.2	1.049	1.078	1.13	1.131	0.225	0.195	355.9	27.6	91.6	10.7	200.6	60	1.03025	1.00588	0.96387	-0.00873	0.00964	0.04953
SB16-01-19	200	F1	25074.6	1.038	1.084	1.126	1.129	0.367	0.341	177.1	2	87.1	0.5	343.4	87.9	1.05186	1.01345	0.93469	-0.00193	0.00088	-0.00408
SB16-01-20	200	F1	27511.1	1.034	1.099	1.136	1.142	0.481	0.456	344.1	2.5	254.1	0.2	159.3	87.5	1.05074	1.02174	0.92752	-0.00895	-0.00181	0.00514
SB16-01-21	200	F1	28625.9	1.069	1.11	1.187	1.188	0.223	0.182	185.6	3.6	94.7	13.2	290.8	76.3	1.07815	1.00608	0.91577	0.00855	0.02114	-0.01257
SB16-01-22	200	F1	25677.4	1.095	1.099	1.203	1.203	0.02	-0.026	2.6	2.4	92.7	1.8	219.4	87	1.09243	0.99849	0.90908	0.00417	0.00311	0.00748
SB16-01-23	200	F1	25758.6	1.061	1.127	1.196	1.2	0.336	0.296	176.6	4.1	86.5	2.2	327.6	85.4	1.07859	1.01746	0.90395	-0.00331	0.0052	-0.01218
SB16-01-24	200	F1	29752.6	1.029	1.109	1.141	1.149	0.574	0.552	22.4	6.6	292	3	178.1	82.7	1.04694	1.02812	0.92493	0.01019	0.00086	0.01581
SB16-01-25	200	F1	27520.9	1.061	1.112	1.181	1.183	0.284	0.246	1.3	20	92.7	3.9	193.4	69.6	1.05646	1.01284	0.9307	-0.00157	0.00821	0.05244
SB16-01-26	200	F1	26499.3	1.051	1.119	1.176	1.181	0.39	0.356	98.8	10.6	189.7	4.7	303.6	78.4	1.01883	1.06468	0.91649	-0.00555	0.02704	-0.01327
SB16-01-27	200	F1	23635.3	1.08	1.11	1.199	1.2	0.151	0.106	179.7	3.3	269.8	0.8	13.3	86.6	1.0866	1.00637	0.90703	-0.00044	-0.00135	-0.01052
SB16-01-28	200	F1	26394.3	1.047	1.131	1.184	1.191	0.459	0.425	355.5	3.5	265.4	0.9	161.6	86.4	1.07043	1.0238	0.90577	-0.00362	-0.00258	0.01
SB16-01-29	200	F1	28122.5	1.067	1.104	1.178	1.179	0.204	0.164	182.3	0.7	92.2	9	276.7	80.9	1.07667	1.0067	0.91662	0.00296	0.01458	-0.00254
SB16-01-30	200	F1	29461	1.07	1.106	1.183	1.184	0.198	0.157	2.3	6.4	93.1	7.4	232.1	80.2	1.07699	1.00711	0.9159	0.00137	0.0131	0.0177
SB16-01-31	200	F1	28105.3	1.076	1.12	1.206	1.207	0.215	0.17	1.2	8.5	91.9	4.3	208.4	80.5	1.08345	1.00989	0.90666	0.00035	0.00866	0.02682
SB16-01-32	200	F1	28373.5	1.059	1.127	1.193	1.197	0.352	0.313	175.3	1.8	85.2	3.5	293.1	86.1	1.07756	1.01812	0.90433	-0.0047	0.00733	-0.00496

## Sheet: Model02_AMS
Name	Field	Freq.	Km	L	F	P	Pj	T	U	K1dec	K1inc	K2dec	K2inc	K3dec	K3inc	K11	K22	K33	K12	K23	K13
SB16-02-01	200	F1	29974.7	1.049	1.043	1.093	1.093	-0.064	-0.086	212.5	40.6	69.3	43.1	320.1	19.4	0.996	0.99059	1.01341	0.03046	-0.00466	-0.02995
SB16-02-02	200	F1	30474.7	1.04	1.024	1.066	1.067	-0.244	-0.259	189.4	54.3	60.6	24.2	318.8	24.5	0.99673	0.98634	1.01693	0.01192	0.0028	-0.02554
SB16-02-03	200	F1	30876.5	1.014	1.013	1.026	1.026	-0.037	-0.043	220	76.5	101.7	6.5	10.4	11.8	0.98852	0.99954	1.01194	-0.00175	-0.00243	-0.00481
SB16-02-04	200	F1	29514.4	1.015	1.021	1.036	1.037	0.17	0.161	143.1	42.9	242.4	9.9	342.6	45.4	0.99774	1.00389	0.99837	-0.00094	0.00757	-0.01584
SB16-02-05	200	F1	27168.7	1.022	1.034	1.057	1.058	0.212	0.198	332.6	74.5	237.5	1.4	147.1	15.4	0.98316	0.99487	1.02197	0.01345	-0.00728	0.01225
SB16-02-06	200	F1	26016.3	1.015	1.009	1.024	1.024	-0.283	-0.288	216	38.1	111.6	17.7	1.9	46.6	0.99993	1.001	0.99907	0.00439	-0.00452	-0.01025
SB16-02-07	200	F1	27803.9	1.007	1.037	1.045	1.048	0.676	0.67	181.9	74.4	278.5	1.9	9.1	15.5	0.97739	1.00887	1.01374	-0.00522	-0.00153	-0.01108
SB16-02-08	200	F1	28384.6	1.01	1.037	1.048	1.05	0.566	0.558	273.9	69.5	112.9	19.4	20.7	6.2	0.97728	1.00544	1.01728	-0.01193	-0.00473	-0.00339
SB16-02-09	200	F1	27267.5	1.022	1.025	1.048	1.048	0.047	0.035	30.5	32.4	140.5	28.3	262.3	44.3	1.01218	0.99258	0.99524	0.00535	0.01705	0.01034
SB16-02-10	200	F1	23003.3	1.005	1.009	1.014	1.014	0.268	0.265	357.2	33.6	104.3	23.9	222.4	46.7	1.00255	0.99935	0.99811	-0.00225	0.00288	0.00566
SB16-02-11	200	F1	25924	1.007	1.028	1.035	1.037	0.575	0.569	11.4	21.9	281.1	0.6	189.6	68.1	1.00903	1.00669	0.98427	0.00062	0.00207	0.01179
SB16-02-12	200	F1	27006.3	1.006	1.012	1.018	1.018	0.377	0.373	293.8	2.2	24.2	10.7	192.3	79.1	1.00267	1.00678	0.99055	-0.00212	0.00029	0.00228
SB16-02-13	200	F1	28839.5	1.021	1.025	1.047	1.047	0.099	0.087	334.4	14.6	73.3	30.5	222.2	55.5	1.01279	1.00136	0.98585	-0.01153	0.00557	0.01314
SB16-02-14	200	F1	26461.6	1.058	1.051	1.112	1.112	-0.062	-0.088	7.3	19.9	100.3	8.5	212.3	68.2	1.0423	0.9958	0.9619	0.00339	0.01121	0.03233
SB16-02-15	200	F1	26979	1.036	1.076	1.115	1.117	0.343	0.319	346.2	16.5	79	9.1	196.7	71	1.03644	1.01275	0.95081	-0.00987	0.00389	0.03066
SB16-02-16	200	F1	30135.5	1.046	1.074	1.124	1.125	0.229	0.201	344.1	28.1	79.5	10	187.1	59.8	1.02375	1.01022	0.96603	-0.01164	-0.00156	0.04853
SB16-02-17	200	F1	29601.3	1.034	1.056	1.092	1.093	0.239	0.218	13.6	4.6	283.4	3	160.1	84.5	1.03824	1.00823	0.95353	0.00796	-0.0011	0.00748
SB16-02-18	200	F1	22948.1	1.058	1.058	1.119	1.119	0.002	-0.026	358.8	3.7	268.5	3.8	133.1	84.7	1.05614	0.9988	0.94506	-0.001	-0.00376	0.00717
SB16-02-19	200	F1	22693.5	1.042	1.072	1.117	1.119	0.261	0.235	359.7	2.6	90.3	11.3	256.7	78.4	1.05061	1.00603	0.94336	-0.00082	0.01306	0.00503
SB16-02-20	200	F1	24977.5	1.057	1.068	1.129	1.129	0.085	0.055	353.1	7.6	84.5	10.2	227	77.2	1.0563	1.00136	0.94234	-0.00829	0.00918	0.01685
SB16-02-21	200	F1	25696.6	1.021	1.046	1.067	1.069	0.376	0.362	164	12.5	254.6	2.7	356.6	77.2	1.02393	1.00933	0.96674	-0.0051	0.00177	-0.01376
SB16-02-22	200	F1	24470.6	1.078	1.064	1.147	1.147	-0.092	-0.126	179.9	2.7	89.8	0.5	349.8	87.3	1.07114	0.99423	0.93463	-0.00016	0.00052	-0.00644
SB16-02-23	200	F1	21805.7	1.082	1.06	1.147	1.147	-0.148	-0.181	6.3	5.8	96.5	1.5	201.4	84	1.07048	0.99262	0.9369	0.00861	0.00303	0.01353
SB16-02-24	200	F1	23383.1	1.09	1.059	1.154	1.155	-0.201	-0.235	3.5	7.9	272.9	4.3	154.3	81	1.07446	0.98882	0.93672	0.00589	-0.00295	0.0197
SB16-02-25	200	F1	24009	1.074	1.076	1.156	1.156	0.01	-0.026	5.9	2.5	275.8	1.3	158.3	87.2	1.07194	0.99949	0.92857	0.0076	-0.00095	0.0064
SB16-02-26	200	F1	24399.7	1.069	1.072	1.146	1.146	0.018	-0.016	3.9	9.8	94.7	4.8	210.6	79.1	1.06431	0.99894	0.93676	0.00346	0.00713	0.02232
SB16-02-27	200	F1	25625.1	1.093	1.079	1.179	1.18	-0.08	-0.121	359.1	0.4	269.1	0.6	121.6	89.3	1.08592	0.99334	0.92074	-0.00139	-0.00082	0.00114
SB16-02-28	200	F1	24315.6	1.093	1.055	1.154	1.155	-0.245	-0.279	5.9	4.3	275.8	1.5	166.1	85.5	1.07666	0.98763	0.93571	0.00948	-0.00027	0.0107
SB16-02-29	200	F1	23378.6	1.084	1.08	1.17	1.17	-0.027	-0.066	13.6	1.5	283.5	4.4	123	85.3	1.0755	1.00086	0.92364	0.0194	-0.00445	0.00544
SB16-02-30	200	F1	26346.5	1.068	1.078	1.152	1.152	0.069	0.034	1.1	8.2	270.2	6.2	143.6	79.8	1.06681	1.00081	0.93238	0.00236	-0.00739	0.01981
SB16-02-31	200	F1	26732	1.107	1.087	1.204	1.204	-0.097	-0.143	177.8	2.6	87.6	5.2	294.3	84.2	1.09687	0.9906	0.91254	-0.00368	0.00749	-0.00812
SB16-02-32	200	F1	25497.5	1.102	1.073	1.182	1.183	-0.159	-0.2	176.4	3.9	266.7	3.7	40.4	84.6	1.08846	0.98894	0.9226	-0.00655	-0.00366	-0.01163
SB16-02-33	200	F1	26926.9	1.086	1.066	1.157	1.158	-0.125	-0.161	7.4	1.1	97.5	3.3	258.4	86.5	1.07567	0.99335	0.93098	0.01084	0.00383	0.00239
SB16-02-34	200	F1	26089.3	1.085	1.079	1.171	1.171	-0.038	-0.078	3.3	2.9	273.3	1.7	153.3	86.7	1.08036	0.99615	0.92349	0.00503	-0.00165	0.00805

## Sheet: Model03_AMS
Name	Field	Freq.	Km	L	F	P	Pj	T	U	K1dec	K1inc	K2dec	K2inc	K3dec	K3inc	K11	K22	K33	K12	K23	K13
SB16-03-01	200	F1	17806.7	1.022	1.082	1.107	1.112	0.562	0.544	106	33.1	235.9	44.5	356.4	27.3	0.95844	1.0328	1.00876	-0.00037	0.01206	-0.03438
SB16-03-02	200	F1	17772.5	1.049	1.099	1.153	1.156	0.33	0.298	143.5	61.1	253.5	10.7	348.9	26.5	0.9508	1.01537	1.03383	0.00838	0.01953	-0.05277
SB16-03-03	200	F1	18626.1	1.061	1.078	1.144	1.144	0.114	0.081	127.5	46.4	252	28.3	0.1	30	0.96028	1.02202	1.0177	-0.01426	0.02426	-0.05001
SB16-03-04	200	F1	18134.8	1.025	1.058	1.084	1.086	0.397	0.38	150	44.1	258.1	17.7	4	40.5	0.98796	1.01319	0.99885	-0.00775	0.00431	-0.03799
SB16-03-05	200	F1	18357.2	1.05	1.084	1.138	1.14	0.244	0.213	178.6	58.7	275.6	4.2	8.2	31	0.96656	1.008	1.02544	-0.00842	-0.00437	-0.05664
SB16-03-06	200	F1	17690.5	1.027	1.057	1.086	1.088	0.351	0.333	252.2	23	135.2	46.9	358.9	34.1	0.97378	1.03012	0.9961	0.00746	-0.00891	-0.0284
SB16-03-07	200	F1	18113.5	1.031	1.092	1.126	1.131	0.478	0.455	11.7	79.9	252.7	4.9	162	8.8	0.94328	1.00985	1.04687	0.02478	-0.00288	0.01767
SB16-03-08	200	F1	16606.3	1.039	1.076	1.118	1.12	0.307	0.282	140.6	83.4	271.7	4.4	2.1	5	0.9403	1.01053	1.04917	-0.0028	0.00267	-0.00963
SB16-03-09	200	F1	17338.5	1.045	1.1	1.15	1.153	0.368	0.337	170.2	84.5	273.4	1.3	3.5	5.4	0.92461	1.01523	1.06016	-0.00568	0.00022	-0.01297
SB16-03-10	200	F1	17583.5	1.032	1.081	1.115	1.119	0.427	0.405	92.8	74	272	16	2	0.2	0.9386	1.01696	1.04444	-0.00279	0.00851	-0.00069
SB16-03-11	200	F1	17622	1.046	1.059	1.108	1.108	0.116	0.091	314.8	86.4	96.4	2.8	186.5	2.2	0.94834	1.00249	1.04917	-0.00632	-0.00182	0.00421
SB16-03-12	200	F1	16813.5	1.059	1.078	1.142	1.142	0.133	0.1	270.6	86.4	103.1	3.5	13	0.8	0.93535	1.00094	1.0637	-0.01599	-0.00398	-0.00092
SB16-03-13	200	F1	18478.3	1.024	1.039	1.064	1.065	0.24	0.226	264.9	11.3	130	74.1	357.1	10.9	0.96819	1.02757	1.00424	0.00387	-0.00428	-0.0075
SB16-03-14	200	F1	17908.4	1.021	1.036	1.058	1.058	0.261	0.248	88.2	30.5	208.1	40.3	334	34.7	0.98559	1.0157	0.99871	0.00977	0.01634	-0.01439
SB16-03-15	200	F1	17811.2	1.032	1.057	1.091	1.092	0.281	0.261	266.4	4.5	168	62	358.8	27.6	0.9649	1.03909	0.99601	0.00286	-0.00201	-0.02249
SB16-03-16	200	F1	19244.6	1.01	1.062	1.072	1.078	0.725	0.717	89.4	7.8	193.2	60.1	355.2	28.6	0.97132	1.02562	1.00306	0.00392	0.00339	-0.02469
SB16-03-17	200	F1	19053.1	1.006	1.04	1.046	1.05	0.73	0.725	260.9	47.1	97.2	41.8	359.8	8.2	0.97314	1.01356	1.01329	0.00056	-0.00301	-0.00593
SB16-03-18	200	F1	16189.8	1.016	1.035	1.052	1.053	0.378	0.367	246.6	61.8	114.5	19.8	17.2	19.3	0.9787	1.00647	1.01482	-0.0074	-0.00928	-0.01289
SB16-03-19	200	F1	17454.4	1.009	1.05	1.06	1.064	0.688	0.68	72.6	5.5	168.5	46.8	337.5	42.7	0.99159	1.01749	0.99091	0.01183	0.01005	-0.02196
SB16-03-20	200	F1	17748.2	1.012	1.052	1.064	1.069	0.63	0.62	140.5	53.8	247.2	11.9	345.3	33.6	0.98263	1.01224	1.00513	0.00657	0.00946	-0.02675
SB16-03-21	200	F1	16141.5	1.029	1.025	1.055	1.055	-0.073	-0.086	180.6	50.8	280.1	7.7	16.2	38.1	0.9961	0.99729	1.00662	-0.00393	-0.00344	-0.02559
SB16-03-22	200	F1	17717	1.026	1.029	1.056	1.056	0.053	0.039	231.2	37	120.6	25	5.2	42.7	0.99213	1.0107	0.99717	0.00676	-0.01105	-0.0219
SB16-03-23	200	F1	17910.4	1.041	1.025	1.067	1.068	-0.235	-0.251	261.5	22.6	104.6	65.6	355.2	8.6	0.97171	1.02824	1.00005	0.00703	-0.01396	-0.0057
SB16-03-24	200	F1	17058.8	1.016	1.031	1.047	1.048	0.304	0.293	284.3	19.2	123.3	69.8	16.5	6.1	0.97821	1.01584	1.00596	-0.01153	-0.00582	-0.00176
SB16-03-25	200	F1	18429.6	1.014	1.053	1.068	1.072	0.566	0.554	64.5	4.9	333.8	8.7	183.4	80	1.01321	1.02386	0.96293	0.00552	0.00164	0.00922
SB16-03-26	200	F1	16009.7	1.027	1.041	1.069	1.069	0.195	0.179	330.9	29.2	69.9	15.6	184.6	56.2	1.00777	1.00879	0.98344	-0.0098	-0.00419	0.02816
SB16-03-27	200	F1	16532.7	1.019	1.006	1.025	1.026	-0.503	-0.508	211.7	15.8	98.6	54.2	311.6	31.2	1.00641	0.99807	0.99552	0.01002	-0.00056	-0.006
SB16-03-28	200	F1	15419.6	1.018	1.023	1.042	1.042	0.121	0.111	207.6	6.4	297.7	0.9	35.4	83.6	1.01535	1.00524	0.97941	0.0072	-0.00239	-0.00383
SB16-03-29	200	F1	15261.6	1.025	1.052	1.079	1.08	0.336	0.319	189.9	23.4	282.4	5.9	25.7	65.8	1.02221	1.00708	0.9707	0.00038	-0.00966	-0.02597
SB16-03-30	200	F1	15508.9	1.029	1.028	1.058	1.058	-0.006	-0.02	146	19.6	246.4	26.9	24.6	55.7	1.00993	1.00606	0.98401	-0.01513	-0.0003	-0.01919
SB16-03-31	200	F1	19301.4	1.026	1.02	1.046	1.046	-0.129	-0.14	178.9	26.7	85	7.7	340.3	62	1.01449	0.99744	0.98807	0.00095	0.00287	-0.0177
SB16-03-32	200	F1	17772.4	1.023	1.026	1.05	1.05	0.06	0.048	126.9	33.5	226.6	14.3	336.2	52.8	0.99878	1.0096	0.99162	-0.00431	0.01357	-0.01775
SB16-03-33	200	F1	16955	1.047	1.024	1.072	1.073	-0.315	-0.33	99.5	13.2	200.4	39.1	354.5	47.9	0.98312	1.03498	0.98191	-0.00611	0.01127	-0.01324
SB16-03-34	200	F1	16423.2	1.016	1.053	1.069	1.072	0.535	0.523	224.9	38.8	119.2	18.5	9.4	45.3	0.99208	1.01567	0.99225	0.00077	-0.00958	-0.03038
SB16-03-35	200	F1	17794.8	1.017	1.053	1.071	1.074	0.5	0.487	15.3	1.9	105.8	14.3	277.7	75.6	1.02726	1.0092	0.96354	0.00485	0.01225	-0.00108
SB16-03-36	200	F1	16984.1	1.005	1.058	1.062	1.07	0.845	0.841	328	16.3	64.5	21.3	203.5	62.7	1.01024	1.01623	0.97352	-0.00623	0.00831	0.02174
SB16-03-37	200	F1	17157.3	1.013	1.053	1.067	1.071	0.604	0.594	189.2	3.2	98.7	7.7	301.2	81.6	1.0251	1.01225	0.96265	0.00253	0.00619	-0.00452
SB16-03-38	200	F1	17283	1.013	1.06	1.074	1.079	0.634	0.623	209.8	8.4	119.1	4.8	359.8	80.3	1.02287	1.01792	0.95922	0.00563	-0.00093	-0.01123
SB16-03-39	200	F1	18754.8	1.011	1.079	1.09	1.099	0.757	0.747	165.4	17.3	74.4	3.4	333.4	72.4	1.02509	1.02058	0.95434	0.00034	0.01042	-0.02226
SB16-03-40	200	F1	14536.5	1.022	1.063	1.086	1.09	0.464	0.447	175	14.3	265.8	3.1	7.9	75.4	1.02975	1.01237	0.95789	-0.00239	-0.00153	-0.01985
SB16-03-41	200	F1	18221.9	1.017	1.052	1.07	1.073	0.502	0.489	192.8	2	102.5	8	296.9	81.8	1.02711	1.01101	0.96188	0.00412	0.00619	-0.0038
SB16-03-42	200	F1	18482.7	1.029	1.059	1.09	1.092	0.327	0.307	174.7	3.2	84.2	9.3	283.6	80.1	1.03805	1.00748	0.95447	-0.00234	0.00938	-0.00389
SB16-03-43	200	F1	17746.9	1.03	1.023	1.054	1.054	-0.12	-0.133	70.4	22.1	188.8	49.6	325.8	31.9	0.98939	1.01509	0.99552	0.01561	0.01542	-0.00496
SB16-03-44	200	F1	17380.1	1.03	1.056	1.087	1.089	0.299	0.28	94.5	26	194.2	19	316.2	56.9	0.99965	1.02426	0.97608	0.00603	0.02866	-0.01853
SB16-03-45	200	F1	17650.9	1.016	1.071	1.089	1.094	0.617	0.604	58.9	5.6	151	20.2	314.2	69	1.01713	1.0246	0.95827	0.01166	0.0176	-0.01495
SB16-03-46	200	F1	18176	1.036	1.079	1.118	1.121	0.361	0.336	348.3	6.4	78.4	1.1	178.5	83.5	1.04627	1.01391	0.93982	-0.00719	-0.00103	0.01223
SB16-03-47	200	F1	18044.2	1.021	1.082	1.105	1.111	0.584	0.567	139.9	11.6	236.2	28.2	29.9	59.1	1.0153	1.02202	0.96268	-0.01886	-0.01424	-0.03266
SB16-03-48	200	F1	15765.5	1.033	1.042	1.077	1.077	0.113	0.094	106.6	4.9	200.7	40.1	10.8	49.5	0.98854	1.03232	0.97915	-0.01225	-0.00101	-0.02048
SB16-03-49	200	F1	17532.3	1.032	1.072	1.107	1.109	0.373	0.351	199.8	0.3	109.8	2.6	297.4	87.4	1.04077	1.01543	0.9438	0.01048	0.00267	-0.00161
SB16-03-50	200	F1	18533.1	1.064	1.077	1.146	1.146	0.092	0.058	5.4	1.2	95.7	12.7	270.1	77.3	1.06583	0.9997	0.93448	0.00601	0.01554	0.00131
SB16-03-51	200	F1	17392.9	1.061	1.088	1.154	1.154	0.175	0.141	184.8	4.4	94.7	1.8	342.8	85.2	1.06642	1.00705	0.92653	0.00527	0.00159	-0.01108
SB16-03-52	200	F1	14851.6	1.076	1.095	1.178	1.178	0.107	0.066	7	0.1	97	4.7	275.6	85.3	1.07852	1.00414	0.91734	0.00928	0.00713	-0.00053
SB16-03-53	200	F1	17545.2	1.044	1.102	1.15	1.154	0.385	0.355	6.2	1.9	96.2	0.8	208.5	87.9	1.06031	1.01686	0.92284	0.00474	0.00179	0.00449
SB16-03-54	200	F1	18272.9	1.034	1.079	1.115	1.118	0.388	0.365	172.3	0.1	82.3	5.3	263.6	84.7	1.04697	1.01318	0.93986	-0.00465	0.00672	0.00069
SB16-03-55	200	F1	17243.2	1.061	1.113	1.182	1.184	0.286	0.248	358.5	8.2	89.3	5.4	212.2	80.2	1.07243	1.01285	0.91472	-0.00296	0.00901	0.02344
SB16-03-56	200	F1	17865.8	1.08	1.097	1.185	1.185	0.092	0.05	353.5	11.2	84.4	4.4	195.4	77.9	1.07543	1.00352	0.92105	-0.00971	0.00308	0.03269
SB16-03-57	200	F1	17827.4	1.062	1.096	1.164	1.165	0.208	0.172	341.3	10.3	74.4	16.2	220.2	70.6	1.05717	1.01077	0.93206	-0.02309	0.01431	0.03144
SB16-03-58	200	F1	15833	1.085	1.066	1.157	1.158	-0.12	-0.156	191.4	5.6	281.5	0.8	19.5	84.3	1.07242	0.9956	0.93198	0.0161	-0.00365	-0.01378
SB16-03-59	200	F1	18830.8	1.048	1.104	1.157	1.16	0.354	0.322	17.8	7.6	108	1.6	210.2	82.2	1.05779	1.01956	0.92265	0.01325	0.00839	0.01713
SB16-03-60	200	F1	17803.9	1.029	1.093	1.125	1.131	0.507	0.485	354.2	17.9	85.3	3.5	185.9	71.7	1.03727	1.01904	0.94369	-0.00362	0.00177	0.03442
SB16-03-61	200	F1	17481.4	1.087	1.093	1.188	1.188	0.031	-0.012	359.2	1.7	89.3	3.1	239.7	86.5	1.08606	0.99909	0.91485	-0.00135	0.00445	0.00526
SB16-03-62	200	F1	14922.2	1.065	1.099	1.17	1.171	0.196	0.158	176.2	7	85.1	9.2	303	78.4	1.0716	1.00594	0.92247	-0.00259	0.01549	-0.01769
SB16-03-63	200	F1	18577.2	1.056	1.089	1.15	1.151	0.218	0.185	167.2	8.8	76.5	4.6	319	80.1	1.05969	1.01021	0.9301	-0.01075	0.01107	-0.0189
SB16-03-64	200	F1	14630.5	1.057	1.098	1.161	1.163	0.255	0.219	172.6	12.3	81.1	6.7	323.1	75.9	1.06189	1.00986	0.92825	-0.0045	0.01437	-0.02908
SB16-03-65	200	F1	16169.4	1.065	1.073	1.143	1.143	0.06	0.027	188.9	5.5	97.9	10.3	306.7	78.3	1.06282	1.00089	0.93629	0.01113	0.00994	-0.01427
SB16-03-66	200	F1	15943.5	1.043	1.111	1.159	1.164	0.425	0.394	187.7	0.6	97.6	10.4	280.8	79.6	1.06234	1.01674	0.92093	0.00649	0.0177	-0.0038
SB16-03-67	200	F1	16055.5	1.047	1.108	1.159	1.163	0.383	0.351	174.5	7.7	83.4	7.6	309.3	79.1	1.06188	1.01547	0.92265	-0.00276	0.01475	-0.01785
SB16-03-68	200	F1	17382.3	1.055	1.1	1.161	1.163	0.285	0.25	167.5	9.4	75.6	11.5	296	75.1	1.06255	1.00993	0.92753	-0.009	0.02259	-0.01881
SB16-03-69	200	F1	16056	1.065	1.094	1.165	1.166	0.174	0.137	173.8	10.7	83.1	4.1	332.4	78.5	1.06691	1.00693	0.92616	-0.00534	0.00914	-0.02696
SB16-03-70	200	F1	16859.9	1.082	1.103	1.193	1.193	0.109	0.065	186.6	6.8	96	4.4	333.5	81.9	1.08228	1.00451	0.91321	0.00993	0.00471	-0.02123
SB16-03-71	200	F1	18838.6	1.101	1.093	1.203	1.203	-0.039	-0.085	188.9	3.3	279.4	8.3	77.3	81.1	1.0922	0.99521	0.91259	0.01491	-0.01356	-0.00858
SB16-03-72	200	F1	16225.6	1.075	1.099	1.181	1.182	0.129	0.088	0.6	3.6	270.2	6.8	118.2	82.3	1.07982	1.00362	0.91656	0.00147	-0.01046	0.01034
SB16-03-73	200	F1	16649.4	1.065	1.077	1.147	1.147	0.075	0.041	171.1	9.8	80.1	5.9	319.4	78.5	1.06242	1.00219	0.93539	-0.00831	0.01077	-0.02151
SB16-03-74	200	F1	17498.6	1.073	1.096	1.176	1.177	0.131	0.091	181.5	3.7	91.1	5.5	304.8	83.4	1.07755	1.00414	0.91831	0.00244	0.00819	-0.01046
SB16-03-75	200	F1	16554.5	1.056	1.132	1.196	1.201	0.388	0.35	182.1	9.3	90.9	6.9	325	78.4	1.07313	1.01905	0.90782	0.00428	0.01318	-0.02848
SB16-03-76	200	F1	15881.3	1.072	1.13	1.211	1.214	0.278	0.233	181.9	6.5	91.2	6	319.1	81.2	1.08492	1.01364	0.90144	0.00371	0.01136	-0.02164
SB16-03-77	200	F1	17225.9	1.084	1.109	1.202	1.203	0.123	0.078	186.5	4.5	277	6.9	63.6	81.7	1.08729	1.00418	0.90852	0.00863	-0.01336	-0.01284
SB16-03-78	200	F1	16429.8	1.096	1.104	1.209	1.209	0.038	-0.009	185.6	4.6	95.5	1	353.7	85.3	1.09286	1.00032	0.90682	0.00925	0.0001	-0.01508

## Sheet: Model04_AMS
Name	Field	Freq.	Km	L	F	P	Pj	T	U	K1dec	K1inc	K2dec	K2inc	K3dec	K3inc	K11	K22	K33	K12	K23	K13
SB16-04-01	200	F1	15039.6	1.03	1.061	1.093	1.095	0.327	0.307	108.7	7.9	199.6	7	330.9	79.4	1.01062	1.03553	0.95385	-0.00826	0.00902	-0.01046
SB16-04-02	200	F1	13311.4	1.042	1.029	1.072	1.073	-0.183	-0.2	86.4	8.3	356.3	0.1	265.8	81.7	0.99551	1.03568	0.96881	0.00256	0.00995	0.00067
SB16-04-03	200	F1	13291	1.037	1.042	1.08	1.08	0.062	0.042	95.8	1.3	186.5	29.2	3.6	60.7	0.99195	1.03739	0.97066	-0.0043	-0.00026	-0.0171
SB16-04-04	200	F1	14608	1.042	1.025	1.068	1.069	-0.259	-0.274	269.6	8.4	178.8	5.3	56.8	80	0.99377	1.03451	0.97171	-4e-05	-0.00948	-0.00227
SB16-04-05	200	F1	14503.6	1.037	1.039	1.077	1.077	0.036	0.017	91.5	5	184.1	28.1	352.2	61.4	0.9919	1.03658	0.97152	0.00025	0.00536	-0.01588
SB16-04-06	200	F1	13591.9	1.018	1.107	1.128	1.138	0.698	0.682	96.2	54.1	262.9	35.2	357.4	6.3	0.92879	1.03314	1.03807	0.00377	0.00938	-0.01187
SB16-04-07	200	F1	11769.1	1.01	1.118	1.129	1.145	0.839	0.83	99.2	78.2	270.7	11.7	1.1	1.7	0.92388	1.03343	1.0427	-0.00209	0.00195	-0.00357
SB16-04-08	200	F1	13698.7	1.047	1.053	1.103	1.103	0.059	0.035	86.9	3.9	296	85.6	177.1	2.2	0.9507	1.04801	1.00128	0.00511	0.0031	0.00208
SB16-04-09	200	F1	14370.9	1.022	1.081	1.106	1.111	0.559	0.541	274.4	20	41.8	59.1	175.8	22.5	0.95299	1.03765	1.00936	0.00327	-0.00931	0.02763
SB16-04-10	200	F1	12843.4	1.026	1.096	1.124	1.131	0.565	0.545	339.7	70	90	7.2	182.5	18.6	0.94377	1.02118	1.03505	-0.00449	-0.00176	0.0348
SB16-04-11	200	F1	11971.7	1.01	1.051	1.062	1.066	0.667	0.659	278.3	0.7	8.5	13.6	185.6	76.4	1.01056	1.02296	0.96648	-0.00172	0.00099	0.01124
SB16-04-12	200	F1	13212.3	1.014	1.049	1.064	1.067	0.561	0.55	51.9	11.1	319.7	11.4	185	74	1.01274	1.01949	0.96777	0.00615	0.00314	0.01416
SB16-04-13	200	F1	14576.8	1.006	1.075	1.081	1.09	0.854	0.849	339.4	1.6	69.6	9.5	240.1	80.4	1.02632	1.02095	0.95273	-0.00277	0.01011	0.00599
SB16-04-14	200	F1	13653.5	1.019	1.052	1.073	1.075	0.459	0.445	73.6	13.1	341.6	8.7	218.9	74.2	1.00955	1.02579	0.96466	0.00315	0.01235	0.01146
SB16-04-15	200	F1	14133.5	1.015	1.072	1.088	1.094	0.654	0.642	2.8	5.1	93.2	4.8	226.6	83	1.03225	1.01738	0.95037	0.00021	0.00613	0.00705
SB16-04-16	200	F1	13089.9	1.011	1.053	1.065	1.069	0.649	0.64	325.5	46.8	75.6	17.9	180	37.7	0.98495	1.01493	1.00012	-0.00246	-0.00316	0.02924
SB16-04-17	200	F1	13162.9	1.022	1.029	1.051	1.051	0.142	0.13	117.1	15.6	350.7	64.8	212.7	19.2	0.98862	1.01072	1.00067	-0.01947	0.00968	0.00479
SB16-04-18	200	F1	12875.2	1.018	1.025	1.043	1.043	0.155	0.145	64.4	76	281.8	11.2	190.2	8.3	0.97946	1.00215	1.01839	-0.00368	0.00441	0.0052
SB16-04-19	200	F1	12744.8	1.05	1.073	1.127	1.128	0.188	0.159	356.6	66.2	261.6	2.2	170.6	23.7	0.95825	1.00479	1.03696	0.00882	-0.00523	0.04344
SB16-04-20	200	F1	13862.1	1.016	1.051	1.068	1.071	0.515	0.503	66.1	16.8	314.6	50.6	168.1	34.4	0.98133	1.02207	0.9966	0.0123	-0.00062	0.02434
SB16-04-21	200	F1	12270.4	1.024	1.055	1.08	1.082	0.378	0.361	13.4	47.6	276.7	6.1	181.2	41.7	0.99069	1.00982	0.99949	0.00191	0.00337	0.03777
SB16-04-22	200	F1	12438.4	1.046	1.004	1.05	1.055	-0.839	-0.842	91.3	5.1	186.8	46.9	356.6	42.7	0.98421	1.03095	0.98484	-0.00091	0.00408	-0.00201
SB16-04-23	200	F1	13592.8	1.029	1.054	1.085	1.086	0.295	0.277	106.7	10	219.1	65.3	12.5	22.4	0.96778	1.03138	1.00083	-0.01712	0.00083	-0.01917
SB16-04-24	200	F1	12721.6	1.039	1.054	1.095	1.095	0.161	0.139	96	10.4	202.8	57.5	359.9	30.4	0.96637	1.04135	0.99228	-0.00383	0.00691	-0.02316
SB16-04-25	200	F1	12326.4	1.025	1.055	1.082	1.084	0.364	0.347	261.4	1.7	169.1	54.3	352.6	35.6	0.97532	1.03351	0.99117	0.0082	0.00246	-0.02492
SB16-04-26	200	F1	12838.5	1.034	1.018	1.053	1.054	-0.311	-0.322	244.2	17.2	83.8	71.8	336	5.7	0.9859	1.01683	0.99727	0.0186	-0.00796	-0.00577
SB16-04-27	200	F1	12495.6	1.052	1.033	1.087	1.087	-0.224	-0.244	98.5	4.6	7.1	16.9	203.4	72.5	0.99193	1.04319	0.96488	-0.00855	0.00773	0.0077
SB16-04-28	200	F1	13675	1.067	1.033	1.102	1.104	-0.329	-0.351	94.7	12.2	200.9	52.2	355.9	35.1	0.96793	1.051	0.98107	-0.00362	0.01468	-0.01599
SB16-04-29	200	F1	14078.4	1.052	1.009	1.062	1.067	-0.696	-0.704	279.7	1.4	10.1	16	184.6	73.9	0.98652	1.036	0.97748	-0.00862	-0.00109	0.0026
SB16-04-30	200	F1	13216.8	1.038	1.002	1.041	1.046	-0.888	-0.89	290.6	0.9	200.5	1.4	54	88.3	0.99278	1.0213	0.98592	-0.01245	-0.00063	0.00018
SB16-04-31	200	F1	11841.5	1.05	1.051	1.104	1.104	0.01	-0.014	102.2	7.9	9.2	20.4	212.4	68	0.99685	1.04438	0.95877	-0.01321	0.0157	0.0128
SB16-04-32	200	F1	13561.5	1.038	1.042	1.082	1.082	0.042	0.022	285.2	5.8	16.4	11.3	168.6	77.3	1.00133	1.03591	0.96276	-0.00926	-0.00542	0.00947
SB16-04-33	200	F1	12539.6	1.013	1.054	1.068	1.072	0.597	0.586	86.9	11.8	349.7	31	195.2	56.3	0.99794	1.02461	0.97745	-0.00334	0.00899	0.02326
SB16-04-34	200	F1	11165.7	1.012	1.091	1.104	1.114	0.765	0.754	53.5	17.5	319	13.9	192.7	67.4	1.01638	1.03099	0.95264	0.00251	0.00942	0.03167
SB16-04-35	200	F1	12442.5	1.062	1.012	1.074	1.08	-0.666	-0.676	278	8.6	17.6	47.8	180.5	40.9	0.97814	1.04185	0.98001	-0.00824	-0.0088	0.00704
SB16-04-36	200	F1	15158.9	1.032	1.087	1.122	1.126	0.447	0.424	332.6	5.8	63.4	8	207.2	80.1	1.03976	1.02244	0.9378	-0.0142	0.00476	0.01508
SB16-04-37	200	F1	13956.2	1.044	1.051	1.097	1.097	0.081	0.058	341.6	4.1	72.4	10.6	230.6	78.6	1.04011	1.00497	0.95492	-0.01392	0.00632	0.00898
SB16-04-38	200	F1	14235.1	1.035	1.065	1.102	1.104	0.299	0.276	175.4	1.9	85.1	9.3	276.7	80.5	1.04355	1.00747	0.94898	-0.00261	0.01006	-0.00233
SB16-04-39	200	F1	14727	1.036	1.046	1.084	1.084	0.119	0.099	23.4	4.6	293.2	1.6	184.3	85.1	1.03273	1.00833	0.95894	0.01311	0.00143	0.00639
SB16-04-40	200	F1	15108.3	1.008	1.083	1.092	1.102	0.819	0.811	59.9	11.9	150	0.2	240.7	78.1	1.02465	1.02682	0.94854	0.00198	0.01523	0.00856
SB16-04-41	200	F1	14607.5	1.018	1.062	1.082	1.086	0.535	0.52	12.3	3.5	281.8	8.2	125.3	81.1	1.03088	1.01346	0.95566	0.00456	-0.00715	0.00636
SB16-04-42	200	F1	13767.8	1.053	1.131	1.19	1.196	0.41	0.373	178.4	2.8	268.5	2.6	41	86.2	1.07473	1.0212	0.90408	-0.0018	-0.00503	-0.0085
SB16-04-43	200	F1	14682.8	1.05	1.111	1.166	1.17	0.368	0.334	175.9	3.3	85.8	2.3	321	86	1.06678	1.01698	0.91624	-0.00334	0.00464	-0.00836
SB16-04-44	200	F1	14670.3	1.048	1.066	1.117	1.117	0.158	0.13	184.6	0.8	94.5	0.6	328.2	89	1.05236	1.00509	0.94256	0.0038	0.0005	-0.00154
SB16-04-45	200	F1	14410.5	1.03	1.107	1.141	1.148	0.545	0.521	1.8	2.7	92	4.4	240.7	84.8	1.05353	1.02206	0.92441	0.00062	0.00782	0.00582
SB16-04-46	200	F1	15777	1.062	1.064	1.129	1.129	0.015	-0.016	184.7	0.7	274.8	3.6	84.3	86.3	1.06072	0.99953	0.93975	0.00507	-0.00389	-0.00111
SB16-04-47	200	F1	15800.7	1.061	1.125	1.193	1.197	0.331	0.291	353.6	2.9	83.7	2.1	209.8	86.4	1.07759	1.0176	0.90482	-0.007	0.00315	0.0092
SB16-04-48	200	F1	11962.2	1.062	1.114	1.183	1.186	0.28	0.241	354.6	0.3	84.6	4.4	261.1	85.6	1.07596	1.01337	0.91068	-0.00605	0.00784	0.00153
SB16-04-49	200	F1	13351.6	1.09	1.124	1.226	1.226	0.15	0.1	189.4	3.4	279.8	6.9	73.3	82.3	1.09474	1.00731	0.89795	0.01397	-0.01504	-0.00956
SB16-04-50	200	F1	14676.2	1.076	1.107	1.19	1.191	0.162	0.119	188.5	1.4	98.5	2.3	309	87.3	1.0814	1.00846	0.91014	0.01131	0.00328	-0.00467
SB16-04-51	200	F1	14147.8	1.069	1.109	1.186	1.187	0.215	0.175	6.9	2.8	276.8	2	151.1	86.6	1.0782	1.01077	0.91103	0.00848	-0.00246	0.00856
SB16-04-52	200	F1	16095.2	1.087	1.158	1.258	1.262	0.277	0.223	355.2	3.6	85.2	0.6	184	86.4	1.10339	1.01747	0.87914	-0.00743	0.00014	0.01411
SB16-04-53	200	F1	16013.6	1.075	1.12	1.203	1.205	0.224	0.18	178	15.7	268	0.2	358.7	74.3	1.07277	1.01107	0.91615	-0.00231	0.00134	-0.04783
SB16-04-54	200	F1	16163.2	1.063	1.152	1.224	1.231	0.396	0.353	20.1	0.2	110.1	1.2	280	88.8	1.08034	1.03102	0.88864	0.02083	0.00285	-0.00027
SB16-04-55	200	F1	13666.9	1.08	1.143	1.234	1.238	0.273	0.223	192.2	1.7	102.2	1	341.5	88	1.09256	1.01909	0.88835	0.01671	0.00088	-0.00651
SB16-04-56	200	F1	13417.1	1.096	1.119	1.226	1.227	0.105	0.054	182.7	3.9	273	4.1	49.3	84.3	1.09846	1.00327	0.89826	0.00403	-0.00837	-0.01349
SB16-04-57	200	F1	14424.3	1.083	1.141	1.236	1.239	0.248	0.198	178.2	6.3	87.3	8.1	305.7	79.7	1.0955	1.01127	0.89322	-0.00071	0.01826	-0.02215
SB16-04-58	200	F1	15502	1.048	1.143	1.198	1.206	0.483	0.448	188.1	11.5	98.1	0.1	7.8	78.5	1.06756	1.02734	0.9051	0.00588	-0.00475	-0.03444
SB16-04-59	200	F1	15270.9	1.048	1.154	1.21	1.219	0.504	0.468	196.7	7.3	287.1	2.8	37.8	82.2	1.07247	1.03227	0.89526	0.01223	-0.01319	-0.02069
SB16-04-60	200	F1	15142.4	1.075	1.138	1.223	1.227	0.279	0.232	358.6	3.4	88.9	4.3	230.8	84.5	1.09123	1.01481	0.89396	-0.00241	0.00894	0.01186
SB16-04-61	200	F1	15172.9	1.062	1.147	1.219	1.225	0.392	0.35	184.7	7.1	274.8	0.7	10.7	82.9	1.08273	1.02306	0.89421	0.00475	-0.00362	-0.02354
SB16-04-62	200	F1	15267.7	1.06	1.126	1.193	1.197	0.339	0.299	170.6	8.1	80.2	2.6	332.3	81.5	1.07387	1.01849	0.90763	-0.00867	0.0091	-0.0231
SB16-04-63	200	F1	13299.1	1.068	1.098	1.173	1.174	0.171	0.132	354.6	0.4	84.6	0.1	193.8	89.6	1.07517	1.00759	0.91724	-0.00649	0.00011	0.00106
SB16-04-64	200	F1	14004.8	1.054	1.125	1.185	1.19	0.383	0.347	189.8	2.6	279.9	1.2	34	87.1	1.07231	1.02091	0.90678	0.00909	-0.00357	-0.00711
SB16-04-65	200	F1	14796.3	1.074	1.114	1.196	1.197	0.203	0.16	192.8	5	283	2.5	39.2	84.4	1.07931	1.01267	0.90803	0.01547	-0.00775	-0.0141
SB16-04-66	200	F1	15852.6	1.037	1.11	1.151	1.157	0.488	0.461	187.6	2.1	277.6	1	32.9	87.7	1.05793	1.02196	0.92012	0.00483	-0.00242	-0.00483
